# Supplementary material for: A one-dimensional urban flow model with an eddy-diffusivity mass-flux (EDMF) scheme and refined turbulent transport (MLUCM v3.0)
Source: Copernicus journal article supplement (doi:10.5194/gmd-17-2525-2024), 2024-04-05
Supplement: Supplementary file 1 [file gmd-17-2525-2024-supplement.zip]

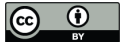

## *Supplement of*

# **A one-dimensional urban flow model with an eddy-diffusivity mass-flux (EDMF) scheme and refined turbulent transport (MLUCM v3.0)**

**Jiachen Lu et al.**

*Correspondence to:* Jiachen Lu ([jiachen.lu@unsw.edu.au](mailto:jiachen.lu@unsw.edu.au))

- [gmd-17-2525-2024-supplement-title-page.pdf](#)
- supplementary
  - .DS\_Store
  - 1Dcomparison
    - \* CL283lp.jpg
    - \* CL563lp.jpg
    - \* HR283lp.jpg
    - \* HR563lp.jpg
    - \* SM283lp.jpg
    - \* SM563lp.jpg

The copyright of individual parts of the supplement might differ from the article licence.
